# Supplementary material
Source: PubMed Central journal article supplement (PMC4491042)
Supplement: NIHMS692124-supplement-1.pdf [file NIHMS692124-supplement-1.pdf]

## Supplemental Figure 1

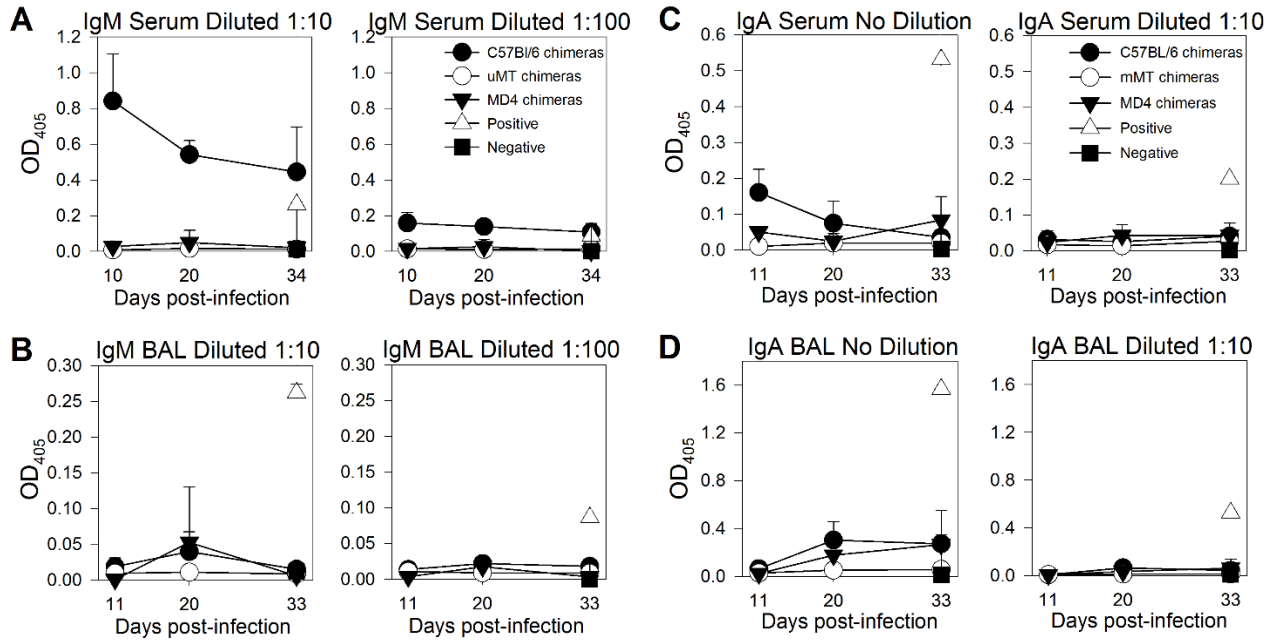

SUPPLEMENTAL FIGURE 1. PC-specific IgM and IgA levels were near the limit of detection in mice with BCR specificity restricted to hen egg lysozyme. BCR transgenic MD4 mice and B cell-deficient  $\mu$ MT mice were used to generate mixed chimeras whose BCR was specific for hen egg lysozyme.  $\mu$ MT mice were irradiated and then reconstituted with a mix of  $\mu$ MT BM cells plus or minus BM from MD4 transgenic and WT (C57Bl/6) animals as described in Methods, to generate WT chimera,  $\mu$ MT chimera, and MD4 chimera groups. After reconstitution, mice were infected with PC organisms and then humanely killed at post-infection timepoints. IgM was measured by PC-specific ELISA both in the serum (A) and in the BAL fluid (B) at dilutions of 1:10 and 1:100 over time post-infection. IgA was measured by PC-specific ELISA in the serum (C) and in the BAL fluid (D) both neat (no dilution) and at a dilution of 1:10. Data are presented as mean  $\pm$  SD for groups of 4-6 mice per timepoint per group and representative of 2 independent experiments.

## Supplemental Figure 2

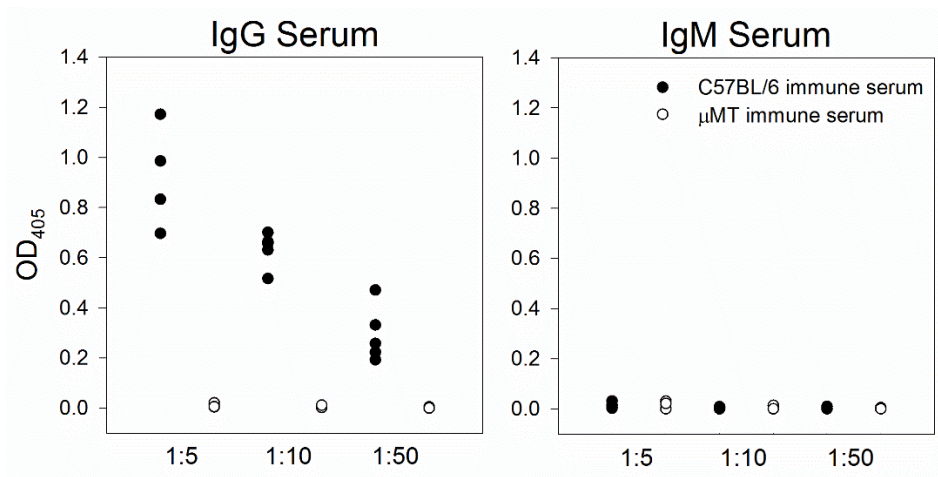

SUPPLEMENTAL FIGURE 2. PC-specific IgG and IgM were measured in the serum of infected  $\mu$ MT mice that received serum from previously infected donor mice. B cell deficient mice ( $\mu$ MT) were infected with PC and then given twice-weekly injections of serum either from infected C57BL/6 donors or from infected  $\mu$ MT donors. PC-specific IgG and IgM were measured by ELISA in the serum of the mice 21 days after infection as described in Methods. Each dot represents data generated from an individual mouse in samples diluted at 1:5, 1:10, and 1:50.

### Supplemental Figure 3

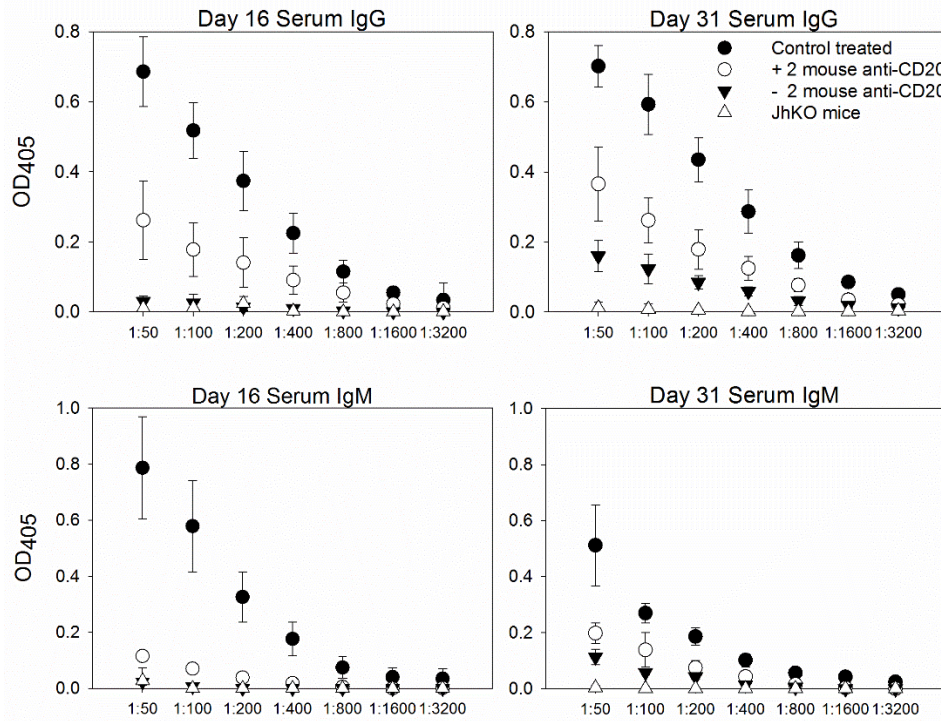

SUPPLEMENTAL FIGURE 3. PC-specific IgG and IgM was measured in mice that received anti-CD20 antibody. BALB/c mice were infected with  $10^7$  PC organisms. To deplete B cells, mice received either a one-time i.p. injection of 10mg/kg anti-mouse CD20 antibody 2 days before infection (noted as “-2”), or a series of injections every 7 days starting at day 2 after infection (“+2”). Control groups consisted both of BALB/c mice that received anti-human CD20 antibody, and Jh<sup>-/-</sup> mice that lack B cells. PC-specific IgG and IgM were measured in the serum of the mice at 16 and 31 days post-infection over a dilution range from 1:50 to 1:3200. Data are presented as mean  $\pm$  SD for groups of 4 mice per timepoint per group.
